# Supplementary material for: A chromium oxide coated nickel/yttria stabilized zirconia electrode with a heterojunction interface for use in electrochemical methane reforming
Source: Royal Society of Chemistry journal article supplement (doi:10.1039/c5ra01927c), 2015-01-01
Supplement: c5ra01927c1.pdf [file c5ra01927c1.pdf]

# Chromium oxide coated nickel/yttria-stabilized zirconia electrode with heterojunction interface toward electrochemical methane reforming

Wentao Qi,<sup>a</sup> Shigang Chen,<sup>a</sup> Yucheng Wu,<sup>a</sup> Kui Xie,<sup>a, b \*</sup>

<sup>a</sup> School of Materials Science and Engineering, Hefei University of Technology, No.193 Tunxi Road, Hefei, Anhui 230009, China.

<sup>b</sup> Fujian Institute of Research on the Structure of Matter, Chinese Academy of Sciences, 155 Yangqiao Road West, Fuzhou, 350002, China

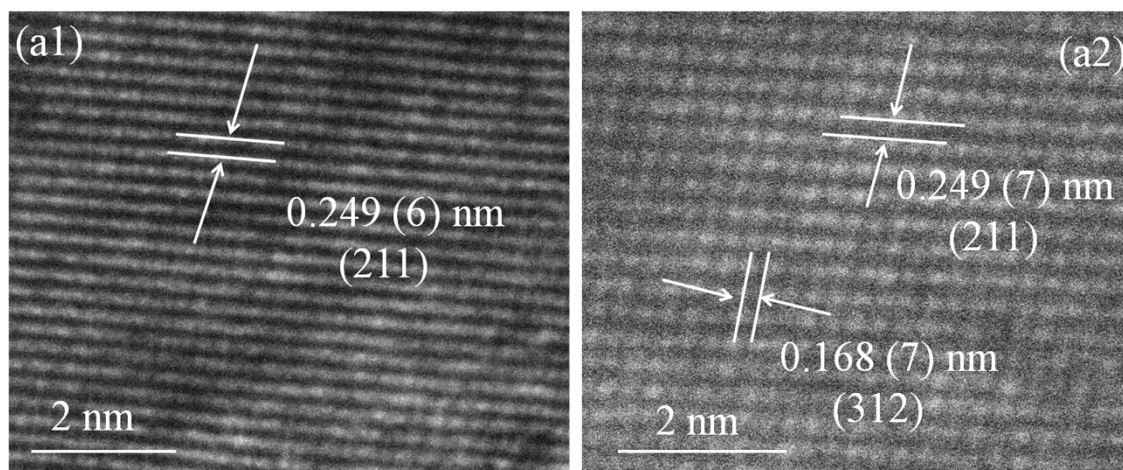

Fig. S1: The TEM graph of the oxidized  $\text{NiCr}_2\text{O}_4$  (a1) and (a2).

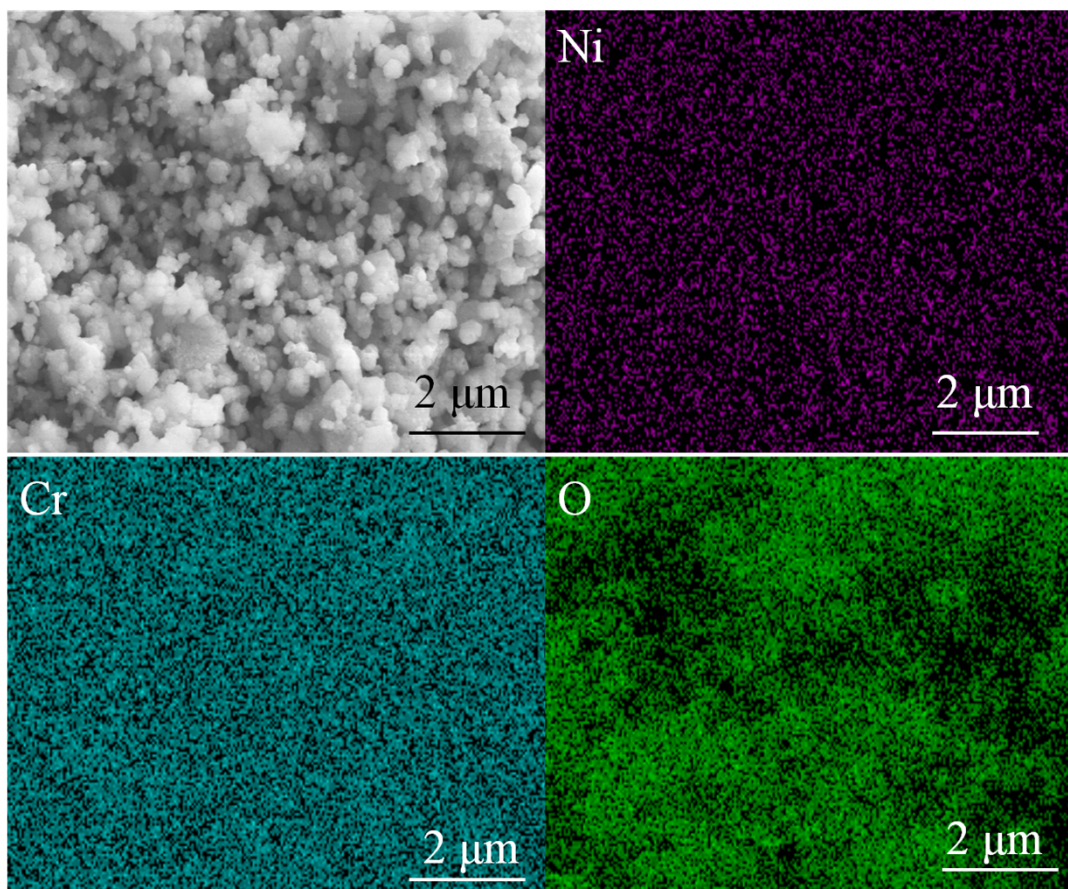

Fig. S2: SEM and EDS results of the reduced form of  $\text{NiCr}_2\text{O}_4$ .

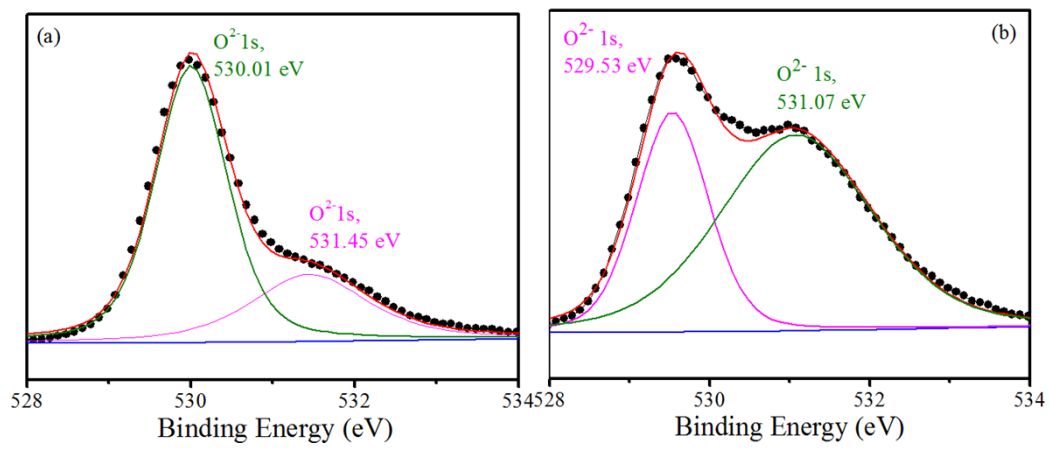

Fig. S3: XPS results of O (a) in the oxidized NiCr<sub>2</sub>O<sub>4</sub>; (b) in the reduced NiCr<sub>2</sub>O<sub>4</sub>.

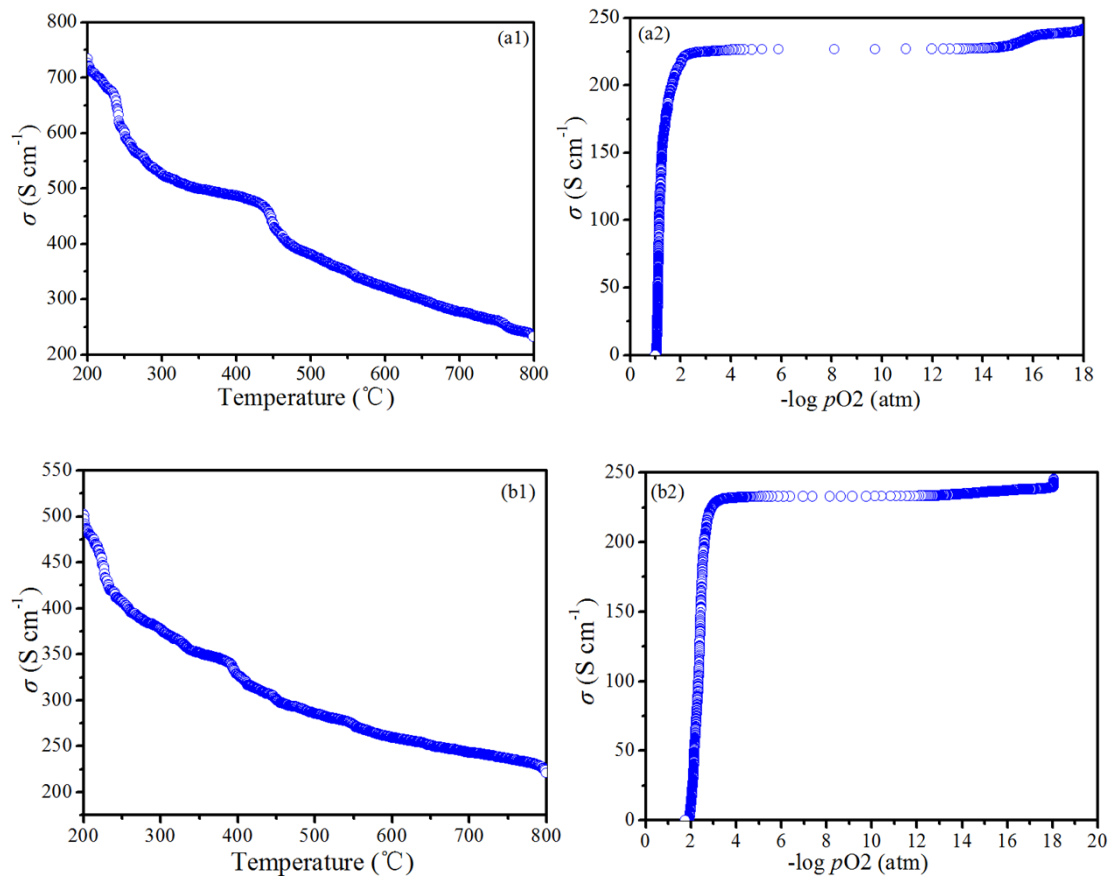

Fig. S4: (a1) and (b1) The dependence of conductivities on temperature of the reduced form of Ni/YSZ and 5% Cr<sub>2</sub>O<sub>3</sub>-Ni/YSZ samples; (a2) and (b2) the dependence of the conductivities on oxygen partial pressure of the reduced form of Ni/YSZ and 5% Cr<sub>2</sub>O<sub>3</sub>-Ni/YSZ samples at 800 °C.
